# Supplementary material for: Rational design of Polymeric Hybrid Micelles to Overcome Lymphatic and Intracellular Delivery Barriers in Cancer Immunotherapy
Source: PubMed Central journal article supplement — Theranostics. 2017 Sep 26;7(18):4383–98. doi: 10.7150/thno.20745 (PMC5695138; doi:10.7150/thno.20745), 2017-09-26
Supplement: thnov07p4383s1.pdf [file thnov07p4383s1.pdf]

---

## Rational design of Polymeric Hybrid Micelles To Overcome Lymphatic And Intracellular Delivery Barriers In Cancer Immunotherapy

Hanmei Li <sup>1a,b</sup>, Yanping Li <sup>1a</sup>, Xue Wang <sup>a</sup>, Xiaoyu Hong <sup>a</sup>, Tao Gong <sup>a</sup>, Zhirong Zhang <sup>a</sup>, and Xun Sun <sup>\*a</sup>

<sup>1</sup> Contributed equally to this work

<sup>a</sup> Key Laboratory of Drug Targeting and Drug Delivery Systems, Ministry of Education, West China School of Pharmacy, Sichuan University, Chengdu 610041, China

<sup>b</sup> College of Pharmacy and Biological Engineering, Chengdu University, Chengdu 610106, China

**\*Corresponding author:**

E-mail: [sunxun@scu.edu.cn](mailto:sunxun@scu.edu.cn)

### SUPPLEMENTARY TABLES AND FIGURES

**Table S1.** The composition of various PHMs with different weight ratio of PCL-PEI to PCL-PEG.

|         | Trp2/PHM-0/CpG | Trp2/PHM-5/CpG | Trp2/PHM-10/CpG | Trp2/PHM-25/CpG | Trp2/PHM-50/CpG |
|---------|----------------|----------------|-----------------|-----------------|-----------------|
| PCL-PEG | 100            | 95             | 90              | 75              | 50              |
| PCL-PEI | 0              | 5              | 10              | 25              | 50              |

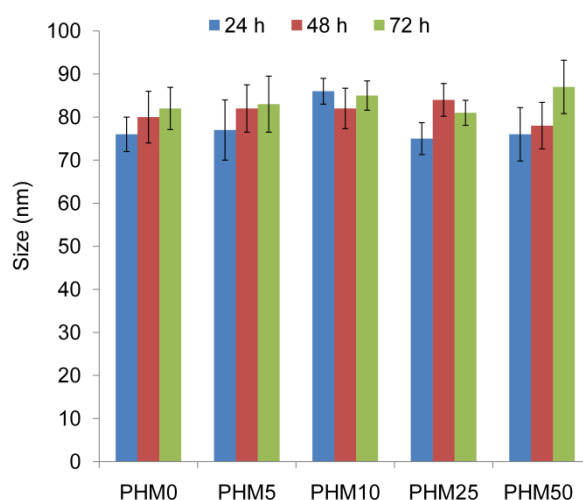

**Figure S1.** The stability of various Trp2/PHM/CpG nanoparticle after storage at 4 °C for 72 h.

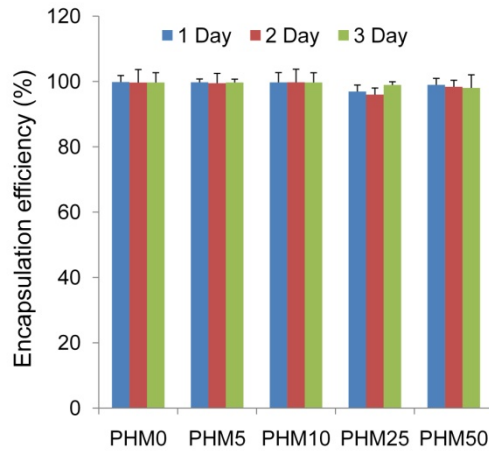

**Figure S2.** The encapsulation efficiency of various Trp2/PHM/CpG nanoparticle after storage at 4 °C for 72 h.

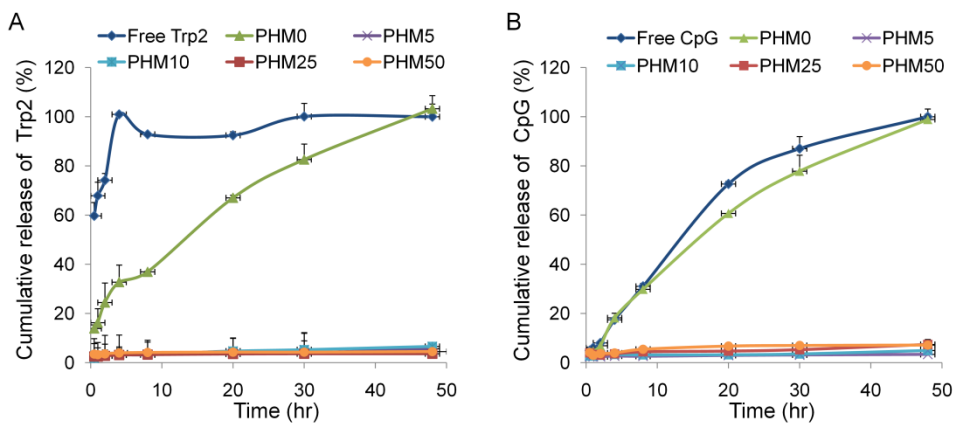

**Figure S3 .** Release profiles of Trp2 (A) and CpG (B) from various Trp2/PHM/CpG formulation in PBS (PH=7.4).

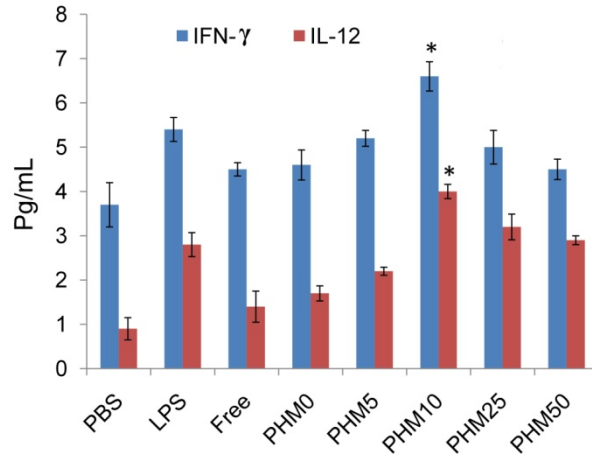

**Figure S4.** Secretion levels of IFN- $\gamma$  and IL-12 from BMDCs after treated by various Trp2/PHM/CpG formulations. Cells were treated with PHM formulations at 37 °C for 24 h. The concentrations of IFN- $\gamma$  and IL-12 were measured by ELISA. Results are shown as mean  $\pm$  SD (n = 5). Statistical comparisons were made relative to PBS. \*P < 0.05.

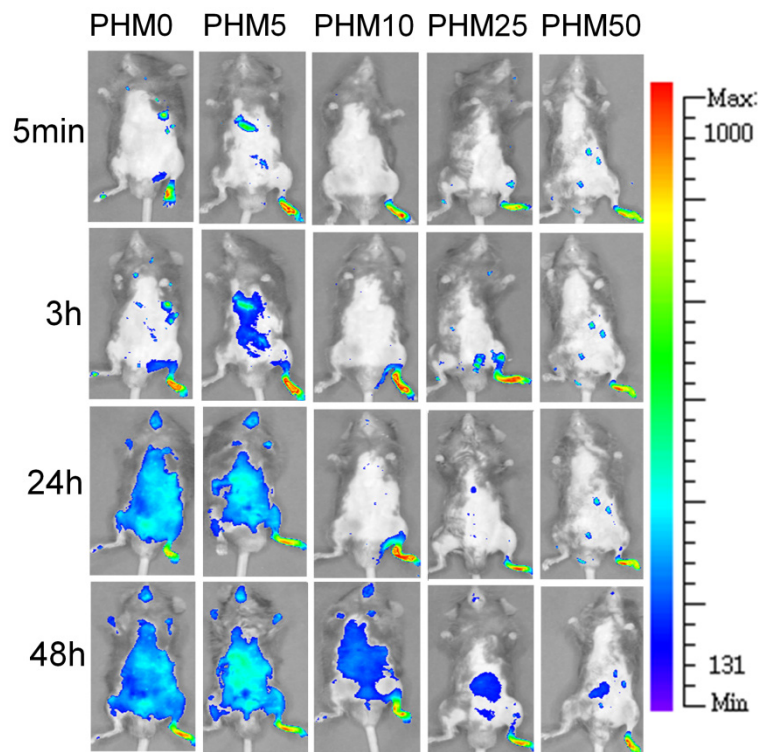

**Figure S5.** Whole-body imaging of mice at 5 min, 3 h, 24 h and 48 h after subcutaneous injection.

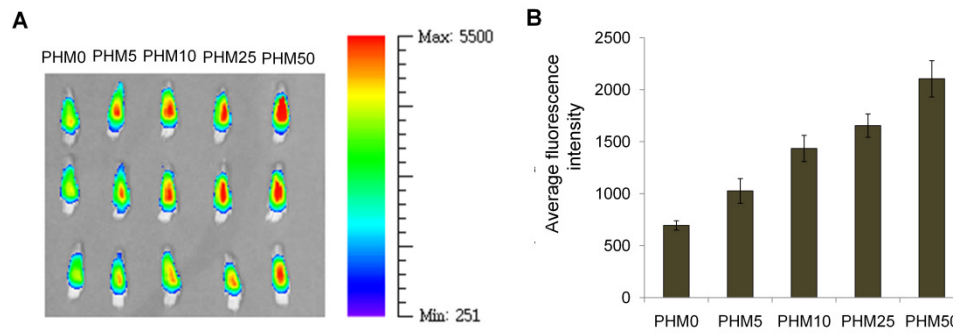

**Figure S6.** The retarding of DiD in the injected foot pad. **(A)** *Ex vivo* imaging of the injected foot pad after 24 h. **(B)** The average fluorescence intensity for the DiD retarding in the injected foot pad after 24 h.

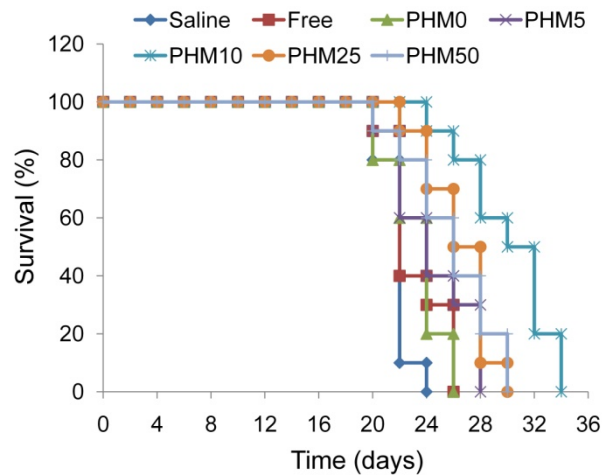

**Figure S7.** Survival analysis of mice bearing B16F10 tumors. C57BL/6 mice were inoculated with B16F10 cells ( $1 \times 10^5$ ) subcutaneously on day 0. Animals were vaccinated with saline, Trp2/CpG, Trp2/PHM0/CpG, Trp2/PHM5/CpG, Trp2/PHM10/CpG, Trp2/PHM25/CpG or Trp2/PHM50/CpG (16  $\mu$ g Trp2, 1.6  $\mu$ g CpG) on days 4, 11 and 18. Dates of the animal death were recorded every 2 days to draw the survival curve (n=10).

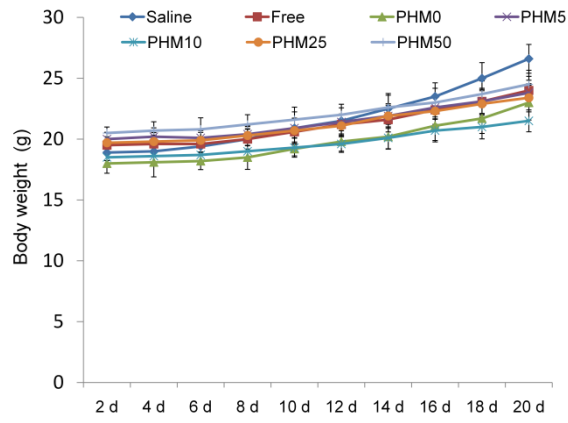

**Figure S8.** Body weight of mice bearing B16F10 subcutaneous tumor during the vaccination therapy with saline, Trp2/CpG, Trp2/PHM-0/CpG, Trp2/PHM-5/CpG, Trp2/PHM-10/CpG, Trp2/PHM-25/CpG and Trp2/PHM-50/CpG. Body weight were measured every 2days.
